# Supplementary material for: Effects of Vitamin D Supplementation on Renin and Aldosterone Concentrations in Patients with Advanced Heart Failure: The EVITA Trial
Source: Int J Endocrinol. 2018 Jul 3;2018:5015417. doi: 10.1155/2018/5015417 (PMC6051119; doi:10.1155/2018/5015417)
Supplement: Supplementary Materials — Supplemental Table 1: mean change from baseline in parameters of mineral metabolism in vitamin D-deficient patients with heart failure. [file 5015417.f1.docx]

**Supplemental Table 1:** Mean change from baseline in parameters of mineral metabolism in vitamin D deficient patients with heart failure

|  | Vitamin D group (n=37) | | | Placebo group (n=30) | | | Treatment effect | P-value3 |
| --- | --- | --- | --- | --- | --- | --- | --- | --- |
| Characteristics | Baseline | Follow-up  (36 months) | Mean change  from baseline1 | Baseline | Follow-up  (36 months) | Mean change  from baseline1 | Adjusted  between-group  differences2 |  |
| 25OHD (nmol/L) | 20.4 (18.6 to 22.2) | 83.7 (67.6 to 99.8) | 68.7 (53.4 to 84.1)*** | 21.3 (18.9 to 23.6) | 45.6 (35.0 to 56.1) | 22.7 (12.1 to 33.3)*** | 39.8 (20.0 to 59.6) | <0.001 |
| 1,25(OH)2D (pmol/L) | 81.4 (70.5 to 92.3) | 89.8 (72.7 to 106.9) | 6.0 (-9.6 to 21.7) | 86.2 (74.0 to 98.6) | 78.0 (62.2 to 97.8) | -8.9 (-20.4 to 2.8) | 15.7 (-3.8 to 35.1) | 0.112 |
| Phosphate (mmol/L) | 0.86 (0.80 to 0.92) | 0.99 (0.86 to 1.13) | 0.14 (0.02 to 0.26)* | 0.98 (0.90 to 1.06) | 1.01 (0.93 to 1.09) | 0.06 (-0.05 to 0.17) | 0.02 (-0.14 to 0.18) | 0.785 |
| FGF-23 (RU/mL) | 134 (85 to 183) | 1583 (-348 to 3513) | 1368 (-451 to 3185)** | 300 (74 to 526) | 505 (152 to 858) | 205 (-70 to 481) | 1241 (-1037 to 3519) | 0.280 |
| Renin (mIU/L) | 859 (333 to 1384) | 1656 (742 to 2572) | 847 (-110 to 1803) | 507 (273 to 741) | 430 (133 to 727) | -61 (-362 to 241) | 1365 (343 to 2386) | 0.010 |
| Aldosterone (ng/L) | 176 (126 to 226) | 183 (122 to 234) | 14 (-38 to 66) | 292 (198 to 387) | 203 (122 to 284) | -82 (-148 to -17)** | 5.07 (-2.42 to 12.56) | 0.181 |

**Notes:** 1Change from baseline data is shown as mean and 95% confidence interval of the mean; 2 between group differences at study termination, with adjustments for baseline values, and initial age, phosphate and aldosterone levels,3probability of between group differences at study termination, with adjustments for baseline values, and initial age and phosphate level (ANCOVA). *P<0.05 vs. baseline; **P<0.01 vs. baseline; ***P<0.001 vs. baseline (Wilcoxon-test)

**Abbreviations:** 1,25(OH)2D: 1,25-dihydroxyvitamin D; 25OHD: 25-hydroxyvitamin D; FGF: fibroblast growth factor
